# Supplementary material
Source: HighWire-hosted journal article supplement (https://bibliotheek.ehb.be/content/8/1/e000736)
Supplement: inline-supplementary-material-1 [file inline-supplementary-material-1.pdf]

1. What is the first line bowel preparation laxative that is offered to patients undergoing colonoscopy?
2. Do you offer any alternative bowel preparation laxatives for patients undergoing colonoscopy?
3. How many patients received each bowel preparation laxative between 1st January 2018- 1<sup>st</sup> January 2019?
4. What were the number of patients receiving each bowel preparation laxative who had inadequate bowel preparation between 1st January 2018- 1<sup>st</sup> January 2019?
5. Are patients undergoing colonoscopy advised to take the bowel preparation at a single time or split over two different times?
6. During the period of 1st January 2018- 1<sup>st</sup> January 2019, what times were patients advised to consume the bowel preparation for a morning colonoscopy appointment?
7. During the period of 1st January 2018- 1<sup>st</sup> January 2019, what times were patients advised to consume the bowel preparation for an afternoon colonoscopy appointment?
8. During the period of 1st January 2018- 1<sup>st</sup> January 2019, what times were patients advised to consume the bowel preparation for an evening colonoscopy appointment?
9. Are patient's advised to consume a particular diet prior to their colonoscopy? If so what diet are they advised to consume? How many days are they advised to consume it for?
10. Do any of your patients attend a specific pre assessment clinic after they are referred for colonoscopy, but before they attend on the day of their endoscopy to receive more detailed endoscopy information? What is the criteria for referral to this pre assessment clinic?
11. How many patients are seen in this pre assessment clinic between 1st January 2018- 1<sup>st</sup> January 2019?
12. How many colonoscopies did you perform in the last year (1st January 2018- 1<sup>st</sup> January 2019)
13. During the period of 1st January 2018- 1<sup>st</sup> January 2019:
14. How many patients were documented as having excellent bowel preparation?
15. What was the polyp detection rate in patient with excellent bowel preparation?
16. How many patients were documented as having good bowel preparation?
17. What was the polyp detection rate in patient with good bowel preparation?
18. How many patients were documented as having fair bowel preparation?
19. What was the polyp detection rate in patient with fair bowel preparation?
20. How many patients were documented as having inadequate bowel preparation?
21. What was the polyp detection rate in patient with inadequate bowel preparation?
22. How many patients had a morning appointment during the period of 1st January 2018- 1<sup>st</sup> January 2019?
23. How many patients who had a morning appointment during the period of 1st January 2018- 1<sup>st</sup> January 2019 had inadequate bowel prep?
24. How many patients had an afternoon appointment during the period of 1st January 2018- 1<sup>st</sup> January 2019?
25. How many patients who had an afternoon appointment during the period of 1st January 2018- 1<sup>st</sup> January 2019 had inadequate bowel prep?
26. How many patients had an evening appointment during the period of 1st January 2018- 1<sup>st</sup> January 2019?
27. How many patients who had an evening appointment during the period of 1st January 2018- 1<sup>st</sup> January 2019 had inadequate bowel prep?
28. If a patient has a repeat colonoscopy due to inadequate bowel preparation, do you have a specific bowel preparation regime for those patients? If so what is it?
